# Supplementary material for: Impact of ambient air pollution and wheeze-associated disorders in children in Southeast Asia: a systematic review and meta-analysis
Source: publisher site journal article supplement (doi:10.1515/reveh-2018-0079), 2019-02-12
Supplement: Supplementary file 1 [file reveh-2018-0079_suppl.docx]

**SUPPLEMENTARY MATERIAL**

# **Impact of ambient air pollution and wheeze-associated disorders in children in Southeast Asia: A systematic review and meta-analysis**

Ly M. T. Luong1,2,3, Peter D. Sly1,2, Phong K. Thai4, Dung Phung5*

1Faculty of Medicine, The University of Queensland, Australia

2Children's Health and Environment Program, The University of Queensland, Australia

3Faculty of Environmental Sciences, VNU University of Science, Vietnam

4Queensland Alliance for Environmental Health Science (QAEHS), The University of Queensland, Australia

5Centre for Environment and Population Health, School of Medicine, Griffith University, Australia

*Corresponding authors:

Email: [d.phung@griffith.edu.au](mailto:phong.thai@qut.edu.au) (DP)

Table 1. Literature search strategy

| **Search queries** | |
| --- | --- |
| 1 | (“Air Quality” OR "Ambient Air" OR "Air pollution" OR "Air pollutant" OR "Air pollutants" OR "Air Toxics" OR “Traffic Pollution”OR "Traffic air pollution" OR “Traffic Pollutants” OR "Traffic-related air pollution" OR “Inhalation exposure” OR “Airborne Particle” OR “Airborne Particles” OR “Airborne Pollutant” OR “Airborne Pollutants” OR “Particulate matter” OR “Ozone” OR “Nitrogen dioxide” OR “Sulfur dioxide” OR “Carbon monoxide” OR PM10 OR PM2.5 OR PM1 OR O3 OR NO2 OR SO2) |
| 2 | AND (respiratory OR wheezing OR wheezings OR wheeze OR “sibilant rhonchi” OR Allergies OR Asthma OR “reactive airway” OR “Gastroesophageal reflux” OR “Acid reflux” OR Infections OR Bronchiolitis OR Bronchitis OR bronchiectasis OR Pneumonia OR “Upper respiratory infection” OR “Lower respiratory infection” OR “Obstructive sleep apnea” OR "Respiratory Sounds" OR Hypersensitivity OR "Respiratory Tract Infections") |
| 3 | AND (hospitalization OR hospitalizations OR hospitalisation OR hospitalisations OR hospitalized OR admission OR admissions OR "emergency visit" OR "emergency visits" OR "emergency department visit" OR "emergency department visits" OR "hospital visit" OR "hospital visits" OR outpatients OR "health effect" OR "health effects" OR morbidity OR death OR mortality) |
| 4 | AND (Asian OR "Southeast Asia” OR ASEAN OR Brunei OR Cambodia OR "East Timor” OR Indonesia OR Laos OR Malaysia OR Myanmar OR Philippines OR Singapore OR Thailand OR Vietnam OR "Southeastern Asia") |

Table 2. Quality assessment

| Criteria |  | Question | Score | Max Score | Tri-Tugaswati et al. | Chew et al. | Vichit-Vadakan et al. | Aekplakom et al. | Hong et al. | Langkulsen et al. | Vichit-Vadakan et al. | Mehta et al. | Asa et al. | Rahman et al. | Nhung et al. | Luong et al. |
| --- | --- | --- | --- | --- | --- | --- | --- | --- | --- | --- | --- | --- | --- | --- | --- | --- |
| 1996 | 1999 | 2001 | 2003 | 2004 | 2006 | 2008 | 2013 | 2016 | 2017 | 2018 | 2018 |
| Source of the Information | 1 | Published in a peer review journal | 3 | 3 | 0 | 3 | 3 | 3 | 3 | 3 | 3 | 3 | 0 | 3 | 3 | 3 |
| 2 | Not peer review but reviewed by some other groups | 2 |  | 2 | 0 | 0 | 0 | 0 | 0 | 0 | 0 | 0 | 0 | 0 | 0 |
| 3 | Not reviewed journal or groups | 1 |  | 0 | 0 | 0 | 0 | 0 | 0 | 0 | 0 | 1 | 0 | 0 | 0 |
| 4 | Unpublished |  |  |  |  |  |  |  |  |  |  |  |  |  |  |
| If the study is unpublished, is the investigator willing to assure that this final, clean data? Y/N | 0 | 0 | 0 | 0 | 0 | 0 | 0 | 0 | 0 | 0 | 0 | 0 | 0 | 0 |
| 5 | Are the investigators and all institutional affiliations identified? Y/N | 1 | 1 | 1 | 1 | 1 | 1 | 1 | 1 | 1 | 1 | 1 | 1 | 1 | 1 |
| 6 | When were information collected |  |  |  |  |  |  |  |  |  |  |  |  |  |  |
| Recent 5 years | 3 | 3 | 0 | 0 | 0 | 0 | 0 | 0 | 0 | 0 | 3 | 0 | 3 | 3 |
| Recent 10 years | 2 |  | 0 | 0 | 0 | 0 | 2 | 0 | 0 | 0 | 0 | 2 | 0 | 0 |
| More than 10 years | 1 |  | 1 | 1 | 1 | 1 | 0 | 1 | 1 | 1 | 0 | 0 | 0 | 0 |
| Study Design | 7 | Is the design described clearly? | 1 | 1 | 1 | 1 | 1 | 1 | 1 | 1 | 1 | 1 | 1 | 1 | 1 | 1 |
| 8 | Is the design appropriate to the study questions? |  | 4 |  |  |  |  |  |  |  |  |  |  |  |  |
|  | Case reports and case series | 0 |  |  |  |  |  |  |  |  |  |  |  |  |  |
|  | Cross-sectional studies | 1 |  | 1 |  |  |  | 1 | 1 |  |  | 1 |  |  |  |
|  | Case-control studies | 2 |  |  |  |  |  |  |  |  |  |  |  |  |  |
|  | Cohort /Panel studies | 3 |  |  |  | 3 | 3 |  |  |  |  |  |  |  |  |
|  | Time series / Case-crossover studies | 4 |  |  | 4 |  |  |  |  | 4 | 4 |  | 4 | 4 | 4 |
| 9 | Are there exposure indicators (ambient air pollutants) clearly defined, including methods of measurement? |  |  |  |  |  |  |  |  |  |  |  |  |  |  |
| Clearly definition | 1 | 1 | 1 | 1 | 1 | 1 | 1 | 1 | 1 | 1 | 1 | 1 | 1 | 1 |
| Change in one unit of air pollutants | 1 | 1 | 0 | 1 | 1 | 1 | 0 | 0 | 1 | 1 | 0 | 1 | 1 | 1 |
| 10 | Are there appropriate statistical packages for data analysis? | 1 | 1 | 0 | 0 | 0 | 1 | 1 | 1 | 1 | 0 | 1 | 0 | 1 | 1 |
| 11 | Are there controlling for potential confounding factors (e.g. temperature, relative humidity, season, trend, DOW, etc.)? | 1 | 1 | 0 | 1 | 1 | 1 | 1 | 0 | 1 | 1 | 0 | 0 | 1 | 1 |
| 12 | Are the outcome (wheezing symptom diseases) clearly defined using ICD9 or ICD10? | 2 | 2 | 0 | 2 | 0 | 0 | 0 | 0 | 2 | 2 | 0 | 0 | 2 | 2 |
| General group of wheeze associated disorder | 1 | 1 | 1 | 0 | 1 | 1 | 0 | 1 | 0 | 1 | 1 | 1 | 1 | 1 |
| Cause-specific Wheeze associated disorder | 1 | 1 | 0 | 1 | 0 | 0 | 1 | 1 | 1 | 0 | 0 | 0 | 0 | 0 |
| Study Results | 13 | Are baseline characteristics of research location, ambient air pollutants, and outcome well described? | 1 | 1 | 1 | 1 | 1 | 1 | 1 | 1 | 1 | 1 | 1 | 1 | 1 | 1 |
| 14 | Is the main question/hypothesis answered properly? | 1 | 1 | 0 | 1 | 1 | 1 | 1 | 1 | 1 | 1 | 1 | 1 | 1 | 1 |
| 15 | Are OR/RR, 95%CI, p value presented? | 2 | 2 | 0 | 2 | 2 | 2 | 2 | 2 | 2 | 2 | 2 | 2 | 2 | 2 |
| 16 | Are potential confounding factors presented? | 1 | 1 | 0 | 0 | 0 | 0 | 0 | 1 | 0 | 1 | 0 | 0 | 1 | 0 |
| 17 | How high sensitivity of analysis was presented? |  |  |  |  |  |  |  |  |  |  |  |  |  |  |
| Degrees of freedom (for season and trend) | 1 | 1 | 0 | 0 | 0 | 0 | 0 | 0 | 1 | 1 | 0 | 0 | 1 | 1 |
| Other factor classification (gender, etc.) | 1 | 1 | 1 | 0 | 1 | 0 | 0 | 0 | 1 | 0 | 0 | 0 | 1 | 0 |
| Study Discussion | 18 | Discuss in limitations/innovation of the study? | 1 | 1 | 0 | 1 | 1 | 1 | 1 | 1 | 1 | 1 | 0 | 1 | 1 | 1 |
| 19 | Comparison with previous work? | 1 | 1 | 1 | 1 | 1 | 1 | 1 | 1 | 1 | 1 | 1 | 1 | 1 | 1 |
| 20 | Discuss in plausibility? | 1 | 1 | 1 | 1 | 1 | 1 | 1 | 1 | 1 | 1 | 0 | 1 | 1 | 1 |
| Total score | | |  | 30 | 12 | 23 | 21 | 21 | 19 | 19 | 26 | 25 | 15 | 21 | 29 | 27 |

Table 3. Sensitivity analysis for PM10

|  |  | RR | 95% CI | | I2 | P0 |
| --- | --- | --- | --- | --- | --- | --- |
| Main results (All provided lags) | | 1.020 | 0.999 | 1.041 | 99.60% | 0.000 |
| Sensitivity analysis | | | | | | |
| 1. Leave - one- study -out | | | | | | |
| Study left out | Vichit-Vadakan | 1.017 | 0.995 | 1.039 | 99.60% | 0.000 |
| Aekplakorn | 1.021 | 0.999 | 1.043 | 99.60% | 0.000 |
| Vichit-Vadakan | 1.019 | 0.997 | 1.040 | 99.60% | 0.000 |
| Mehta(1) | 1.023 | 1.001 | 1.045 | 99.60% | 0.000 |
| Mehta(2) | 1.021 | 0.999 | 1.043 | 99.60% | 0.000 |
| Mehta(3) | 1.025 | 1.003 | 1.047 | 99.60% | 0.000 |
| Rahman (1) | 1.012 | 0.991 | 1.034 | 99.60% | 0.000 |
| Rahman (2) | 1.022 | 1.006 | 1.039 | 98.60% | 0.000 |
| Rahman (3) | 1.019 | 0.995 | 1.043 | 99.60% | 0.000 |
| Rahman (4) | 1.016 | 0.999 | 1.033 | 98.80% | 0.000 |
| Nhung (1) | 1.022 | 1.000 | 1.045 | 99.60% | 0.000 |
| Nhung (2) | 1.021 | 0.999 | 1.044 | 99.60% | 0.000 |
| Nhung (3) | 1.022 | 0.999 | 1.045 | 99.60% | 0.000 |
| 2.Only shortest single lag or cumulative lag | | 1.020 | 0.999 | 1.041 | 99.60% | 0.000 |
| 3. Lower quality score studies were included | | 1.023 | 1.002 | 1.044 | 99.40% | 0.000 |
| 4. Only time-series and case-cross over approach studies were considered | | 1.018 | 0.995 | 1.040 | 99.70% | 0.000 |
| 5. Small studies were excluded | | 1.007 | 0.995 | 1.020 | 95.4% | 0.000 |

Abbreviations: CI, confidence interval; I2: index of heterogeneity; RR, risk ratio.

I2 ranges from 0-100 % where they represent low, moderate and high heterogeneity, respectively. The p-value is based on Q test.

The association changed from non-significant to significant in sensitivity analysis 1 and 3, other sensitivity analyses did not show any notable changes in the results.

Table 4. Sensitivity analysis for PM2.5

|  |  | RR | 95% CI | | I2 | P0 |
| --- | --- | --- | --- | --- | --- | --- |
| Main results (All provided lags) | | 1.010 | 1.001 | 1.020 | 57.5% | 0.051 |
| Sensitivity analysis | | | | | | |
| 1. Leave - one- study -out | | | | | | |
| Study left out | Vichit-Vadakan | 1.010 | 1.000 | 1.019 | 63.10% | 0.043 |
| Aekplakorn | 1.010 | 1.000 | 1.020 | 64.60% | 0.037 |
| Nhung (1) | 1.015 | 1.008 | 1.022 | 0.00% | 0.659 |
| Nhung (2) | 1.009 | 0.997 | 1.021 | 58.70% | 0.064 |
| Nhung (3) | 1.011 | 0.996 | 1.025 | 56.90% | 0.073 |
| 2. Only shortest single lag or cumulative lag | | 1.010 | 1.001 | 1.020 | 57.50% | 0.051 |
| 3. Lower quality score studies were included | | - | - | - | - | - |
| 4. Only time-series and case-cross over approach studies were considered | | 1.009 | 0.999 | 1.019 | 72.20% | 0.027 |
| 5. Small studies were excluded | | 1.009 | 0.999 | 1.019 | 72.20% | 0.027 |

Abbreviations: CI, confidence interval; I2: index of heterogeneity; RR, risk ratio.

I2 ranges from 0-100 % where they represent low, moderate and high heterogeneity, respectively. The p-value is based on Q test.

Sensitivity analyses did not show any notable changes in the results.

Table 5. Sensitivity analysis for PM1

|  |  | RR | 95% CI | | | I2 | P0 |
| --- | --- | --- | --- | --- | --- | --- | --- |
| Main results (All provided lags) | | 1.017 | 1.007 | 1.028 | | 0.00% | 0.704 | |
| Sensitivity analysis | | | | | | | |
| 1. Leave - one- study -out | | | | | | | |
| Study left out | Nhung (1) | 1.020 | 1.008 | | 1.032 | 0.00% | 1.000 |
| Nhung (2) | 1.016 | 1.004 | | 1.029 | 0.00% | 0.435 |
| Nhung (3) | 1.015 | 1.001 | | 1.029 | 0.00% | 0.488 |
| 2. Only shortest single lag or cumulative lag | | 1.017 | 1.007 | | 1.028 | 0.00% | 0.704 |
| 3. Lower quality score studies were included | | - | - | | - | - | - |
| 4. Only time-series and case-cross over approach studies were considered | | 1.017 | 1.007 | | 1.028 | 0.00% | 0.704 |
| 5. Small studies were excluded | | - | - | | - | - | - |

Abbreviations: CI, confidence interval; I2: index of heterogeneity; RR, risk ratio.

I2 ranges from 0-100 % where they represent low, moderate and high heterogeneity, respectively. The p-value is based on Q test.

Sensitivity analyses did not show any notable changes in the results.

Table 6. Sensitivity analysis for SO2

|  |  | | RR | 95% CI | | I2 | | P0 |
| --- | --- | --- | --- | --- | --- | --- | --- | --- |
| Main results (All provided lags) | | 0.999 | | 0.985 | 1.014 | | 61.70% | 0.001 |
| Sensitivity analysis | | | | | | | | |
| 1. Leave - one- study -out | | | | | | | | |
| Study left out | Chew | | 0.993 | 0.974 | 1.012 | 61.20% | | 0.002 |
| Aekplakorn (1) | | 0.999 | 0.984 | 1.015 | 64.50% | | 0.001 |
| Aekplakorn (2) | | 1.004 | 0.991 | 1.018 | 53.10% | | 0.012 |
| Aekplakorn (3) | | 1.002 | 0.987 | 1.017 | 61.80% | | 0.002 |
| Aekplakorn (4) | | 1.000 | 0.985 | 1.016 | 63.70% | | 0.001 |
| Aekplakorn (5) | | 1.003 | 0.989 | 1.018 | 61.30% | | 0.003 |
| Aekplakorn (6) | | 1.002 | 0.988 | 1.016 | 59.10% | | 0.003 |
| Aekplakorn (7) | | 1.002 | 0.988 | 1.016 | 58.70% | | 0.004 |
| Mehta (1) | | 0.997 | 0.981 | 1.013 | 64.00% | | 0.001 |
| Mehta (2) | | 0.997 | 0.982 | 1.011 | 60.90% | | 0.002 |
| Mehta (3) | | 1.000 | 0.985 | 1.016 | 63.60% | | 0.001 |
| Nhung (1) | | 0.995 | 0.976 | 1.014 | 64.10% | | 0.001 |
| Nhung (2) | | 0.996 | 0.980 | 1.012 | 63.20% | | 0.001 |
| Nhung (3) | | 0.997 | 0.979 | 1.014 | 64.40% | | 0.001 |
| 2. Only shortest single lag or cumulative lag | | | 1.012 | 1.005 | 1.019 | 5.00% | | 0.392 |
| 3. Lower quality score studies were included | | | - | - | - | - | | - |
| 4. Only time-series and case-cross over approach studies were considered | | | 1.012 | 1.004 | 1.020 | 16.8% | | 0.301 |
| 5. Small studies were excluded | | | 1.012 | 1.004 | 1.020 | 16.8% | | 0.301 |

Abbreviations: CI, confidence interval; I2: index of heterogeneity; RR, risk ratio.

I2 ranges from 0-100 % where they represent low, moderate and high heterogeneity, respectively. The p-value is based on Q test.

The association changed from negative to significantly positive in sensitivity analysis and 5, other sensitivity analyses did not show any notable changes in the results.

Table 7. Sensitivity analysis for NOx

|  |  | RR | 95% CI | | I2 | P0 |
| --- | --- | --- | --- | --- | --- | --- |
| Main results (All provided lags) | | 1.013 | 0.997 | 1.029 | 56.30% | 0.101 |
| Sensitivity analysis | | | | | | |
| 1. Leave - one- study -out | | | | | | |
| Study left out | Nhung (1) | 1.019 | 1.000 | 1.039 | 59.70% | 0.115 |
| Nhung (2) | 1.006 | 0.995 | 1.018 | 0.00% | 0.433 |
| Nhung (3) | 1.015 | 0.989 | 1.045 | 76.80% | 0.038 |
| 2. Only shortest single lag or cumulative lag | | 1.013 | 0.997 | 1.029 | 56.30% | 0.101 |
| 3. Lower quality score studies were included | | - | - | - | - | - |
| 4. Only time-series and case-cross over approach studies were considered | | 1.013 | 0.997 | 1.029 | 56.30% | 0.101 |
| 5. Small studies were excluded | | - | - | - | - | - |

Abbreviations: CI, confidence interval; I2: index of heterogeneity; RR, risk ratio.

I2 ranges from 0-100 % where they represent low, moderate and high heterogeneity, respectively. The p-value is based on Q test.

Sensitivity analyses did not show any notable changes in the results.

Table 8. Sensitivity analysis for NO2

|  |  | RR | 95% CI | | I2 | P0 |
| --- | --- | --- | --- | --- | --- | --- |
| Main results (All provided lags) | | 1.008 | 0.998 | 1.018 | 94.20% | 0.000 |
| Sensitivity analysis | | | | | | |
| 1. Leave - one- study -out | | | | | | |
| Study left out | Chew | 1.009 | 0.998 | 1.020 | 94.30% | 0.000 |
| Mehta(1) | 1.009 | 0.999 | 1.019 | 94.70% | 0.000 |
| Mehta(2) | 1.007 | 0.997 | 1.017 | 94.60% | 0.000 |
| Mehta(3) | 1.010 | 1.000 | 1.020 | 94.60% | 0.000 |
| Rahman (1) | 1.008 | 0.998 | 1.018 | 94.70% | 0.000 |
| Rahman (2) | 1.010 | 1.004 | 1.016 | 68.70% | 0.001 |
| Rahman (3) | 1.007 | 0.997 | 1.017 | 91.60% | 0.000 |
| Rahman (4) | 1.009 | 0.998 | 1.020 | 94.30% | 0.000 |
| Nhung (1) | 1.008 | 0.998 | 1.019 | 94.20% | 0.000 |
| Nhung (2) | 1.005 | 0.996 | 1.015 | 94.30% | 0.000 |
| Nhung (3) | 1.006 | 0.996 | 1.016 | 94.20% | 0.000 |
| 2. Only shortest single lag or cumulative lag | | 1.008 | 0.998 | 1.018 | 94.20% | 0.000 |
| 3. Lower quality score studies were included | | 1.008 | 0.998 | 1.018 | 93.60% | 0.000 |
| 4. Only time-series and case-cross over approach studies were considered | | 1.008 | 0.998 | 1.018 | 94.20% | 0.000 |
| 5. Small studies were excluded | | 1.008 | 0.996 | 1.020 | 91.10% | 0.000 |

Abbreviations: CI, confidence interval; I2: index of heterogeneity; RR, risk ratio.

I2 ranges from 0-100 % where they represent low, moderate and high heterogeneity, respectively. The p-value is based on Q test.

Sensitivity analyses did not show any notable changes in the results.

Table 9. Sensitivity analysis for CO

|  |  | RR | 95% CI | | I2 | P0 | |
| --- | --- | --- | --- | --- | --- | --- | --- |
| Main results (All provided lags) | | 1.000 | 0.999 | 1.002 | 74.10% | 0.001 | |
| Sensitivity analysis | | | | | | |
| 1. Leave - one- study -out | | | | | | |
| Study left out | Rahman (1) | 1.000 | 0.999 | 1.002 | 78.40% | 0.000 | |
| Rahman (2) | 1.000 | 0.999 | 1.002 | 72.80% | 0.002 | |
| Rahman (3) | 1.000 | 0.999 | 1.002 | 70.00% | 0.005 | |
| Rahman (4) | 1.000 | 0.999 | 1.002 | 73.70% | 0.002 | |
| Nhung (1) | 1.000 | 0.999 | 1.002 | 78.40% | 0.000 | |
| Nhung (2) | 0.995 | 0.980 | 1.011 | 67.60% | 0.009 | |
| Nhung (3) | 0.995 | 0.980 | 1.011 | 67.90% | 0.008 | |
| 2. Only shortest single lag or cumulative lag | | 1.000 | 0.999 | 1.002 | 74.10% | 0.001 | |
| 3. Lower quality score studies were included | | 1.000 | 0.999 | 1.002 | 65.90% | 0.003 | |
| 4. Only time-series and case-cross over approach studies were considered | | 1.000 | 0.999 | 1.002 | 74.10% | 0.001 | |
| 5. Small studies were excluded | | 1.000 | 0.999 | 1.002 | 68.0% | 0.014 | |

Abbreviations: CI, confidence interval; I2: index of heterogeneity; RR, risk ratio.

I2 ranges from 0-100 % where they represent low, moderate and high heterogeneity, respectively. The p-value is based on Q test.

Sensitivity analyses did not show any notable changes in the results.

Table 10. Sensitivity analysis for O3

|  |  | RR | 95% CI | | | I2 | | P0 | |
| --- | --- | --- | --- | --- | --- | --- | --- | --- | --- |
| Main results (All provided lags) | | 0.999 | 0.998 | 1.001 | | 22.00% | | 0.139 | |
| Sensitivity analysis | | | | | | | | | |
| 1. Leave - one- study -out | | | | | | | | | |
| Study left out | Mehta (1) | 1.000 | 0.998 | 1.001 | 0.152 | | 0.232 | |
| Mehta (2) | 1.000 | 0.998 | 1.001 | 0.232 | | 0.128 | |
| Mehta (3) | 1.000 | 1.000 | 1.001 | 0.000 | | 0.485 | |
| Rahman (1) | 1.000 | 0.998 | 1.001 | 0.190 | | 0.180 | |
| Rahman (2) | 0.999 | 0.996 | 1.001 | 0.244 | | 0.114 | |
| Rahman (3) | 0.998 | 0.995 | 1.002 | 0.215 | | 0.152 | |
| Rahman (4) | 1.000 | 0.998 | 1.002 | 0.209 | | 0.155 | |
| Nhung (1) | 0.999 | 0.997 | 1.001 | 0.239 | | 0.120 | |
| Nhung (2) | 0.999 | 0.997 | 1.001 | 0.245 | | 0.114 | |
| Nhung (3) | 0.999 | 0.997 | 1.001 | 0.229 | | 0.131 | |
| Luong (1) | 1.000 | 0.998 | 1.001 | 0.237 | | 0.123 | |
| Luong (2) | 0.999 | 0.998 | 1.001 | 0.243 | | 0.116 | |
| Luong (3) | 0.999 | 0.998 | 1.001 | 0.239 | | 0.120 | |
| Luong (4) | 1.000 | 0.998 | 1.001 | 0.235 | | 0.124 | |
| Luong (5) | 0.999 | 0.998 | 1.001 | 0.244 | | 0.114 | |
| Luong (6) | 1.000 | 0.998 | 1.001 | 0.224 | | 0.137 | |
| Luong (7) | 0.999 | 0.998 | 1.001 | 0.237 | | 0.123 | |
| Luong (8) | 0.999 | 0.998 | 1.001 | 0.245 | | 0.113 | |
| Luong (9) | 1.000 | 0.998 | 1.001 | 0.232 | | 0.127 | |
| Luong (10) | 1.000 | 0.998 | 1.001 | 0.123 | | 0.276 | |
| Luong (11) | 0.999 | 0.998 | 1.001 | 0.243 | | 0.115 | |
| Luong (12) | 0.999 | 0.998 | 1.001 | 0.229 | | 0.132 | |
| Luong (13) | 0.999 | 0.998 | 1.001 | 0.238 | | 0.121 | |
| Luong (14) | 0.999 | 0.998 | 1.001 | 0.245 | | 0.113 | |
| Luong (15) | 1.000 | 0.998 | 1.001 | 0.191 | | 0.178 | |
| Luong (16) | 0.999 | 0.998 | 1.001 | 0.245 | | 0.114 | |
| Luong (17) | 0.999 | 0.998 | 1.001 | 0.242 | | 0.117 | |
| Luong (18) | 0.999 | 0.998 | 1.001 | 0.244 | | 0.114 | |
| Luong (19) | 0.999 | 0.998 | 1.001 | 0.241 | | 0.118 | |
| Luong (20) | 1.000 | 0.998 | 1.001 | 0.236 | | 0.123 | |
| Luong (21) | 0.999 | 0.998 | 1.001 | 0.239 | | 0.120 | |
| 2. Only shortest single lag or cumulative lag | | 0.999 | 0.997 | 1.002 | 51.90% | | 0.015 | |
| 3. Lower quality score studies were included | | - | - | - | - | | - | |
| 4. Only time-series and case-cross over approach studies were considered | | 0.999 | 0.998 | 1.001 | 22.00% | | 0.139 | |
| 5. Small studies were excluded | | 0.998 | 0.995 | 1.001 | 14.80% | | 0.241 | |

Abbreviations: CI, confidence interval; I2: index of heterogeneity; RR, risk ratio.

I2 ranges from 0-100 % where they represent low, moderate and high heterogeneity, respectively. The p-value is based on Q test.

Sensitivity analyses did not show any notable changes in the results.

Fig 1. Forest plot for the association between SO2 and wheeze – associated disorder in children in Southeast Asia after removing small studies. Risk ratios/Odd Ratios (RRs/ORs) are for an increase of 10 µg/m3 of SO2.

Index of heterogeneity (I2) ranges from 0-100 % where they represent low, moderate and high heterogeneity, respectively. The p-value is based on Q test.
